# Supplementary material for: Acrylated Chitosan Nanoparticles with Enhanced Mucoadhesion
Source: MDPI journal article supplement (doi:10.3390/polym10020106), 2018-01-23
Supplement: s1 [file s1]

## Supplementary Material

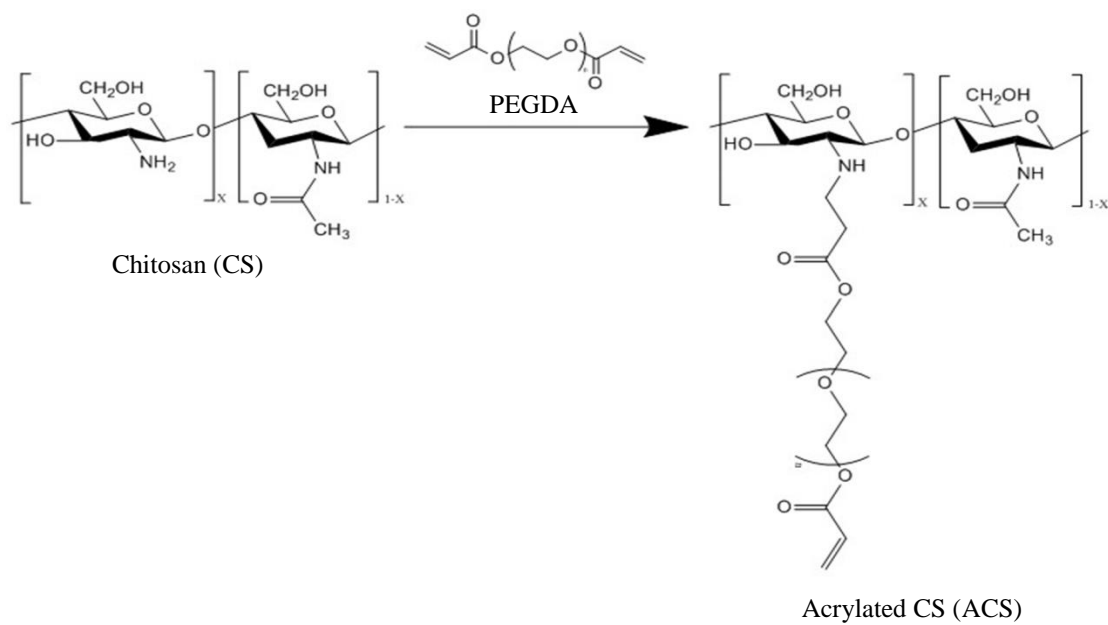

**Figure S1.** The molecular structure of ACS.

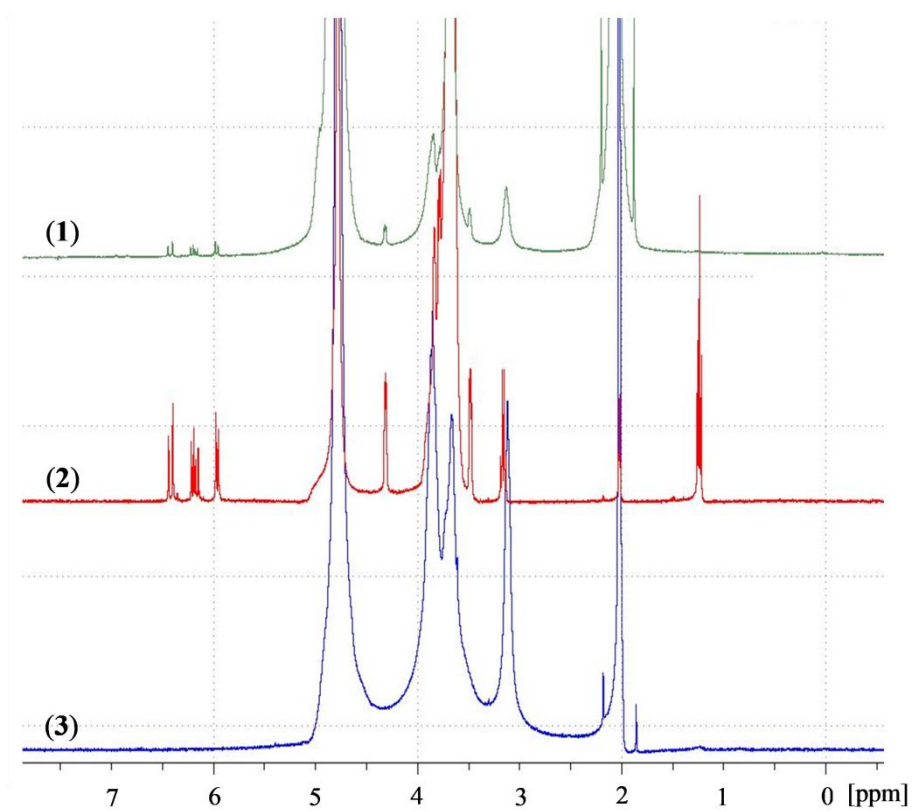

**Figure S2.**  $^1\text{H}$  NMR spectra of (1) ACS, (2) PEGDA and (3) CS in  $\text{D}_2\text{O}$ .
